# Supplementary material for: Lignin condensation inhibition and antioxidant activity improvement in a reductive ternary DES fractionation microenvironment by thiourea dioxide self-decomposition
Source: Royal Society of Chemistry journal article supplement (doi:10.1039/d2nj00821a), 2022-01-01
Supplement: d2nj00821a1.pdf [file d2nj00821a1.pdf]

## Supplementary Information

# **Lignin condensation inhibition and antioxidant activity improvement in a reductive ternary DES fractionation microenvironment by thiourea dioxide self-decomposition**

Xin Zhao<sup>a</sup>, Yingying Yang<sup>a</sup>, Jingyu Xu<sup>a</sup>, Xing Wang<sup>a,b,\*</sup>, Yanzhu Guo<sup>a</sup>, Chao Liu<sup>c</sup>, Jinghui Zhou<sup>a</sup>

<sup>a</sup> Liaoning Key Lab of Lignocellulose Chemistry and BioMaterials, School of Light Industry and Chemical Engineering, Dalian Polytechnic University, Dalian 116034, PR China

<sup>b</sup> Guangxi Key Laboratory of Clean Pulp & Papermaking and Pollution Control, College of Light Industry and Food Engineering, Guangxi University, Nanning 530004, PR China

<sup>c</sup> Key Laboratory of Energy Thermal Conversion and Control of Ministry of Education, School of Energy and Environment, Southeast University, Nanjing 210096, PR China

\*Corresponding author.

E-mail: [wangxing@dlpu.edu.cn](mailto:wangxing@dlpu.edu.cn)

#Authors contributed equally to the production of this paper.

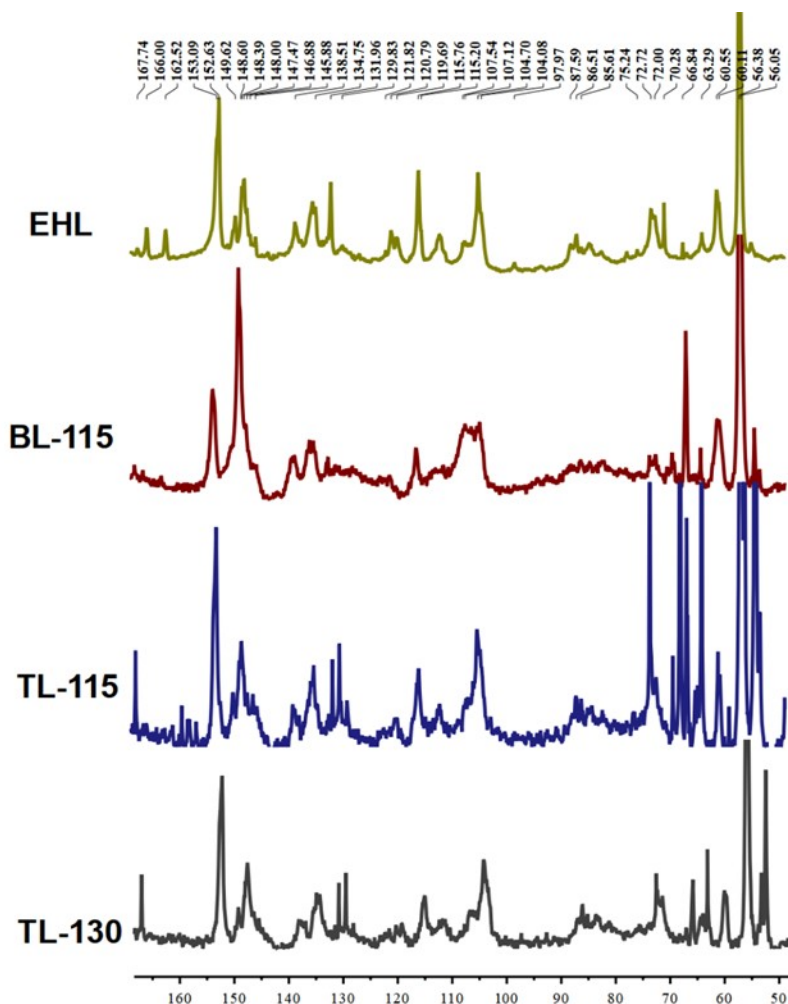

**Figure S1.** Quantitative  $^{13}\text{C}$  NMR spectra of EHL, binary DES lignin and ternary DES lignin.

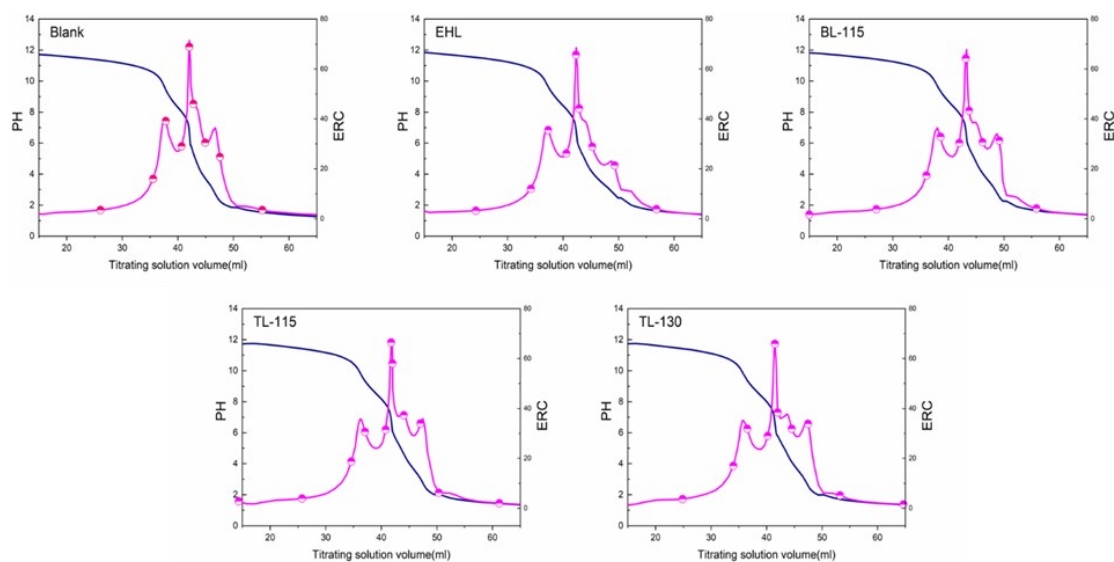

**Figure S2.** Aqueous potentiometric titration curves of lignin samples. Blue curves: PH; Magenta curves: level-one differential quotient of PH curve.

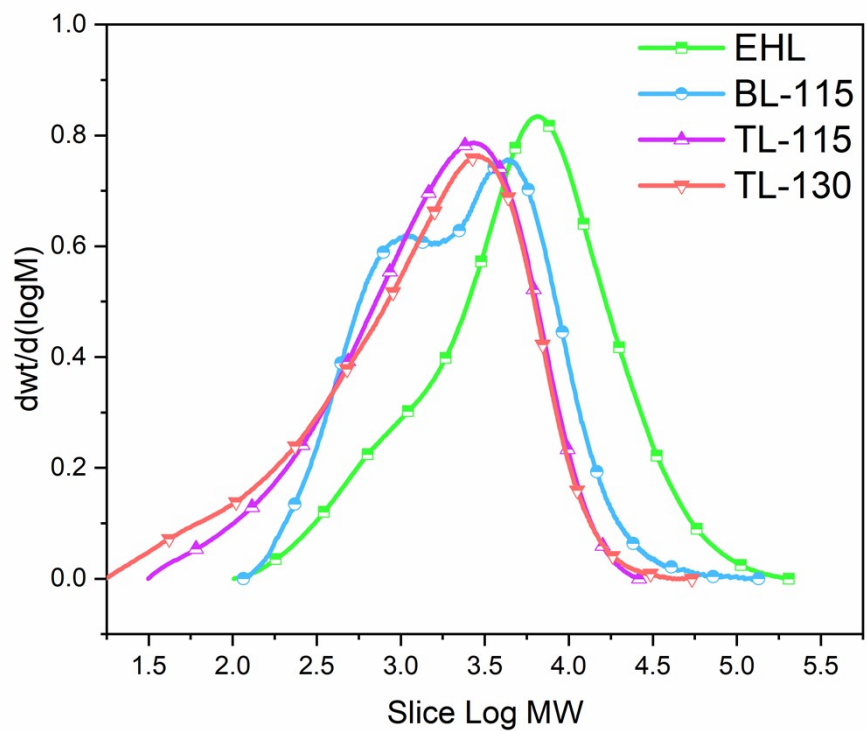

**Figure S3.** Molecular weights of extracted lignin fractions.
